# Supplementary material for: More than 9,000,000 Unique Genes in Human Gut Bacterial Community: Estimating Gene Numbers Inside a Human Body
Source: PLoS One. 2009 Jun 29;4(6):e6074. doi: 10.1371/journal.pone.0006074 (PMC2699651; doi:10.1371/journal.pone.0006074)
Supplement: Table S1 — Genomes used in this paper. Figure*2: the numbers in this column are the figures appeared in the paper or the supplementary material, take the third genome as an example, “1,2,8” indicates NC_002655 was used in the pan-genome analysis for 202 genomes, the pan-genome analysis for 39 E.coli and the core genome analysis for 26 E.coli. Genome*1: The genus name for each genome has been abbreviated to one capital. 1–39: Escherichia; 40–86: Clostridium; 87–97: Bacteroides; 98–107: Campylobacter; 108–110: Providencia; 111: Proteus; 112–116: Listeria; 117: Rickettsia; 118: Salmonella; 119–151: Salmonella enterica subsp. enterica serovar; 152: Salmonella enterica subsp; 153–155: Collinsella; 156: Victivallis; 157–160: Ruminococcus; 161–168: Bacillus; 169–175: Bifidobacterium; 176–183: Shigella; 184–185: Dorea; 186–187: Streptococcus; 188–197: Vibrio; 198–199:Tropheryma; 200: Mitsuokella; 201–203: Lactobacillus; 204: Methanosphaera; 205–207: Eubacterium; 208–209: Parabacteroides; 210–211: Yersinia; 212: Methanobrevibacter; 213: Klebsiella; 214: Akkermansia; 215: Actinomyces; 216: Faecalibacterium; 217: Enterobacter; 218: Anaerostipes; 219: Peptostreptococcus; 220: Coprococcus; 221: Alistipes; 222: Anaerotruncus; 223: Anaerofustis; 224: Roseburia. (0.03 MB XLS) [file pone.0006074.s001.xls]

## Sheet: Sheet1
Index	Genome*1	Genbank Accesion	Status	Protein Coding	Figures*2	Reference
1	E.coli str. K-12 substr. W3110	AC_000091	Complete	4226	2		Mol Syst Biol. 2006;2:2006.0007. Epub 2006 Feb 21. Highly accurate genome sequences of Escherichia coli K-12 strains MG1655 and W3110.Hayashi K, Morooka N, Yamamoto Y, Fujita K, Isono K, Choi S, Ohtsubo E, Baba T, Wanner BL, Mori H, Horiuchi T.
2	E.coli str. K-12 substr. MG1655	NC_000913	Complete	4131	2		Nucleic Acids Res. 2006 Jan 5;34(1):1-9. Print 2006. Escherichia coli K-12: a cooperatively developed annotation snapshot--2005. Riley M, Abe T, Arnaud MB, Berlyn MK, Blattner FR, Chaudhuri RR, Glasner JD, Horiuchi T, Keseler IM, Kosuge T, Mori H, Perna NT, Plunkett G 3rd, Rudd KE, Serres MH, Thomas GH, Thomson NR, Wishart D, Wanner BL.
3	E.coli O157:H7 EDL933	NC_002655	Complete	5312	1,2,8		Nature. 2001 Jan 25;409(6819):529-33. Genome sequence of enterohaemorrhagic Escherichia coli O157:H7.Perna NT, Plunkett G 3rd, Burland V, Mau B, Glasner JD, Rose DJ, Mayhew GF, Evans PS, Gregor J, Kirkpatrick HA, Pósfai G, Hackett J, Klink S, Boutin A, Shao Y, Miller L, Grotbeck EJ, Davis NW, Lim A, Dimalanta ET, Potamousis KD, Apodaca J, Anantharaman TS, Lin J, Yen G, Schwartz DC, Welch RA, Blat…
4	E.coli O157:H7 str. Sakai	NC_002695	Complete	5230	1,2,8		Genes Genet Syst. 1999 Oct;74(5):227-39. Complete nucleotide sequence of the prophage VT2-Sakai carrying the verotoxin 2 genes of the enterohemorrhagic Escherichia coli O157:H7 derived from the Sakai outbreak.Makino K, Yokoyama K, Kubota Y, Yutsudo CH, Kimura S, Kurokawa K, Ishii K, Hattori M, Tatsuno I, Abe H, Iida T, Yamamoto K, Onishi M, Hayashi T, Yasunaga T, Honda T, Sasakawa C, Shinagawa H.
5	E.coli CFT073	NC_004431	Complete	5339	1,2,8		Proc Natl Acad Sci U S A. 2002 Dec 24;99(26):17020-4. Epub 2002 Dec 5. Extensive mosaic structure revealed by the complete genome sequence of uropathogenic Escherichia coli.Welch RA, Burland V, Plunkett G 3rd, Redford P, Roesch P, Rasko D, Buckles EL, Liou SR, Boutin A, Hackett J, Stroud D, Mayhew GF, Rose DJ, Zhou S, Schwartz DC, Perna NT, Mobley HL, Donnenberg MS, Blattner FR.
6	E.coli UTI89	NC_007946	Complete	5021	1,2,8		Proc Natl Acad Sci U S A. 2006 Apr 11;103(15):5977-82. Identification of genes subject to positive selection in uropathogenic strains of Escherichia coli: a comparative genomics approach.Chen SL, Hung CS, Xu J, Reigstad CS, Magrini V, Sabo A, Blasiar D, Bieri T, Meyer RR, Ozersky P, Armstrong JR, Fulton RS, Latreille JP, Spieth J, Hooton TM, Mardis ER, Hultgren SJ, Gordon JI.
7	E.coli 536	NC_008253	Complete	4620	1,2,8		Mol Microbiol. 2006 Aug;61(3):584-95. Role of pathogenicity island-associated integrases in the genome plasticity of uropathogenic Escherichia coli strain 536.Hochhut B, Wilde C, Balling G, Middendorf B, Dobrindt U, Brzuszkiewicz E, Gottschalk G, Carniel E, Hacker J.
8	E.coli APEC O1	NC_008563	Complete	4428	2		J Bacteriol. 2007 Apr;189(8):3228-36 The genome sequence of avian pathogenic Escherichia coli strain O1:K1:H7 shares strong similarities with human extraintestinal pathogenic E. coli genomes.Johnson TJ, Kariyawasam S, Wannemuehler Y, Mangiamele P, Johnson SJ, Doetkott C, Skyberg JA, Lynne AM, Johnson JR, Nolan LK.
9	E.coli HS	NC_009800	Complete	4378	1,2,8	None
10	E.coli E24377A	NC_009801	Complete	4749	1,2,8	None
11	E.coli ATCC 8739	NC_010468	Complete	4200	2	None
12	E.coli str. K-12 substr. DH10B	NC_010473	Complete	4126	2		J Bacteriol. 2008 Apr;190(7):2597-606. The complete genome sequence of Escherichia coli DH10B: insights into the biology of a laboratory workhorse.Durfee T, Nelson R, Baldwin S, Plunkett G 3rd, Burland V, Mau B, Petrosino JF, Qin X, Muzny DM, Ayele M, Gibbs RA, Csörgo B, Pósfai G, Weinstock GM, Blattner FR.
13	E.coli SMS-3-5	NC_010498	Complete	4743	2		J Bacteriol. 2008 Oct;190(20):6779-94. Insights into the environmental resistance gene pool from the genome sequence of the multidrug-resistant environmental isolate Escherichia coli SMS-3-5.Fricke WF, Wright MS, Lindell AH, Harkins DM, Baker-Austin C, Ravel J, Stepanauskas R.
14	E.coli O157:H7 str. EC4115	NC_011353	Complete	5315	1,2,8	None
15	E.coli SE11	NC_011415	Complete	4679	2	None
16	E.coli O127:H6 str. E2348/69	NC_011601	Complete	4554	1,2,8		J Bacteriol. 2009 Jan;191(1):347-54. Complete genome sequence and comparative genome analysis of enteropathogenic Escherichia coli O127:H6 strain E2348/69.Iguchi A, Thomson NR, Ogura Y, Saunders D, Ooka T, Henderson IR, Harris D, Asadulghani M, Kurokawa K, Dean P, Kenny B, Quail MA, Thurston S, Dougan G, Hayashi T, Parkhill J, Frankel G.
17	E.coli IAI1	NC_011741	Complete	4353	2	None
18	E.coli S88	NC_011742	Complete	4696	2	None
19	E.coli ED1a	NC_011745	Complete	4915	2	None
20	E.coli 55989	NC_011748	Complete	4763	2	None
21	E.coli IAI39	NC_011750	Complete	4732	2	None
22	E.coli UMN026	NC_011751	Complete	4826	2	None
23	E.coli B7A	NZ_AAJT00000000	WGS	4648	1,2,8	None
24	E.coli F11	NZ_AAJU00000000	WGS	4704	1,2,8	None
25	E.coli E22	NZ_AAJV00000000	WGS	5105	1,2,8	None
26	E.coli E110019	NZ_AAJW00000000	WGS	4934	1,2,8	None
27	E.coli 53638	NZ_AAKB00000000	WGS	4803	1,2,8	None
28	E.coli 101-1	NZ_AAMK00000000	WGS	4607	1,2,8	None
29	E.coli O157:H7 str. EC4045	NZ_ABHL00000000	WGS	5343	1,2,8	None
30	E.coli O157:H7 str. EC4042	NZ_ABHM00000000	WGS	5232	1,2,8	None
31	E.coli O157:H7 str. EC4196	NZ_ABHO00000000	WGS	5072	1,2,8	None
32	E.coli O157:H7 str. EC4113	NZ_ABHP00000000	WGS	5005	1,2,8	None
33	E.coli O157:H7 str. EC4401	NZ_ABHR00000000	WGS	5185	1,2,8	None
34	E.coli O157:H7 str. EC4486	NZ_ABHS00000000	WGS	5429	1,2,8	None
35	E.coli O157:H7 str. EC4501	NZ_ABHT00000000	WGS	5124	1,2,8	None
36	E.coli O157:H7 str. EC869	NZ_ABHU00000000	WGS	5220	1,2,8	None
37	E.coli O157:H7 str. EC508	NZ_ABHW00000000	WGS	5019	1,2,8	None
38	E.coli O157:H7 str. EC4024	NZ_ABJT00000000	WGS	6414	1,2,8	None
39	E.coli O157:H7 str. TW14588	NZ_ABKY00000000	WGS	5803	1,2,8	None
40	C.acetobutylicum ATCC 824	NC_003030	Complete	3672	2		J Bacteriol. 2001 Aug;183(16):4823-38. Genome sequence and comparative analysis of the solvent-producing bacterium Clostridium acetobutylicum.Nölling J, Breton G, Omelchenko MV, Makarova KS, Zeng Q, Gibson R, Lee HM, Dubois J, Qiu D, Hitti J, Wolf YI, Tatusov RL, Sabathe F, Doucette-Stamm L, Soucaille P, Daly MJ, Bennett GN, Koonin EV, Smith DR.
41	C.perfringens str. 13	NC_003366	Complete	2660	2		Proc Natl Acad Sci U S A. 2002 Jan 22;99(2):996-1001. Complete genome sequence of Clostridium perfringens, an anaerobic flesh-eater.Shimizu T, Ohtani K, Hirakawa H, Ohshima K, Yamashita A, Shiba T, Ogasawara N, Hattori M, Kuhara S, Hayashi H.
42	C.tetani E88	NC_004557	Complete	2373	2		Proc Natl Acad Sci U S A. 2003 Feb 4;100(3):1316-21. The genome sequence of Clostridium tetani, the causative agent of tetanus disease.Bruggemann H, Baumer S, Fricke WF, Wiezer A, Liesegang H, Decker I, Herzberg C, Martinez-Arias R, Merkl R, Henne A, Gottschalk G.
43	C.novyi NT	NC_008593	Complete	2315	2		Nat Biotechnol. 2006 Dec;24(12):1573-80. The genome and transcriptomes of the anti-tumor agent Clostridium novyi-NT.Bettegowda C, Huang X, Lin J, Cheong I, Kohli M, Szabo SA, Zhang X, Diaz LA Jr, Velculescu VE, Parmigiani G, Kinzler KW, Vogelstein B, Zhou S.
44	C.thermocellum ATCC 27405	NC_009012	Complete	3189	2	None
45	C.difficile 630	NC_009089	Complete	3742	1,2,8		Nat Genet. 2006 Jul;38(7):779-86. The multidrug-resistant human pathogen Clostridium difficile has a highly mobile, mosaic genome.Sebaihia M, Wren BW, Mullany P, Fairweather NF, Minton N, Stabler R, Thomson NR, Roberts AP, Cerdeño-Tárraga AM, Wang H, Holden MT, Wright A, Churcher C, Quail MA, Baker S, Bason N, Brooks K, Chillingworth T, Cronin A, Davis P, Dowd L, Fraser A, Feltwell T, Hance Z, Ho…
46	C.botulinum A str. ATCC 3502	NC_009495	Complete	3572	2		Genome Res. 2007 Jul;17(7):1082-92. Genome sequence of a proteolytic (Group I) Clostridium botulinum strain Hall A and comparative analysis of the clostridial genomes.Sebaihia M, Peck MW, Minton NP, Thomson NR, Holden MT, Mitchell WJ, Carter AT, Bentley SD, Mason DR, Crossman L, Paul CJ, Ivens A, Wells-Bennik MH, Davis IJ, Cerdeño-Tárraga AM, Churcher C, Quail MA, Chillingworth T, Feltwell T, Fra…
47	C.beijerinckii NCIMB 8052	NC_009617	Complete	5020	2	None
48	C.kluyveri DSM 555	NC_009706	Complete	3838	2	None
49	C.phytofermentans ISDg	NC_010001	Complete	3902	2	None
50	C.cellulolyticum H10	NC_011898	Complete	3390	2	None
51	C.sp. L2-50	NZ_AAYW00000000	WGS	2949	1,2	None
52	C.leptum DSM 753	NZ_ABCB00000000	WGS	3923	1,2	None
53	C.bolteae ATCC BAA-613	NZ_ABCC00000000	WGS	7284	1,2	None
54	C.butyricum 5521	NZ_ABDT00000000	WGS	3827	1,2	None
55	C.bartlettii DSM 16795	NZ_ABEZ00000000	WGS	2787	1,2	None
56	C.ramosum DSM 1402	NZ_ABFX00000000	WGS	3169	1,2	None
57	C.scindens ATCC 35704	NZ_ABFY00000000	WGS	3995	1,2	None
58	C.sp. SS2/1	NZ_ABGC00000000	WGS	3167	1,2	None
59	C.spiroforme DSM 1552	NZ_ABIK00000000	WGS	2465	1,2	None
60	C.sporogenes ATCC 15579	NZ_ABKW00000000	WGS	3767	1,2	None
61	C.nexile DSM 1787	NZ_ABWO00000000	WGS	4239	1,2	None
62	C.hiranonis DSM 13275	NZ_ABWP00000000	WGS	2271	1,2	None
63	C.hylemonae DSM 15053	NZ_ABYI00000000	WGS	3976	1,2	None
64	C.perfringens NCTC 8239	NZ_ABDY00000000	WGS	2784	1,8	None
65	C.perfringens CPE str. F4969	NZ_ABDX00000000	WGS	2971	1,8	None
66	C.perfringens E str. JGS1987	NZ_ABDW00000000	WGS	3586	1,8	None
67	C.perfringens B str. ATCC 3626	NZ_ABDV00000000	WGS	3301	1,8	None
68	C.perfringens C str. JGS1495	NZ_ABDU00000000	WGS	3104	1,8	None
69	C.perfringens D str. JGS1721	NZ_ABOO00000000	WGS	3345	1,8	None
70	C.perfringens SM101	NC_008262	Complete	2558	1,8		Genome Res. 2006 Aug;16(8):1031-40. Skewed genomic variability in strains of the toxigenic bacterial pathogen, Clostridium perfringens.Myers GS, Rasko DA, Cheung JK, Ravel J, Seshadri R, DeBoy RT, Ren Q, Varga J, Awad MM, Brinkac LM, Daugherty SC, Haft DH, Dodson RJ, Madupu R, Nelson WC, Rosovitz MJ, Sullivan SA, Khouri H, Dimitrov GI, Watkins KL, Mulligan S, Benton J, Radune D, Fisher DJ, Atkins…
71	C.difficile QCD-32g58	NZ_AAML00000000	WGS	4071	1,8	None
72	C.difficile QCD-23m63	NZ_ABKL00000000	WGS	3587	1,8	None
73	C.difficile CIP 107932	NZ_ABKK00000000	WGS	3646	1,8	None
74	C.difficile QCD-63q42	NZ_ABHD00000000	WGS	4243	1,8	None
75	C.difficile QCD-76w55	NZ_ABHE00000000	WGS	4074	1,8	None
76	C.difficile QCD-97b34	NZ_ABHF00000000	WGS	3759	1,8	None
77	C.difficile QCD-37x79	NZ_ABHG00000000	WGS	4067	1,8	None
78	C.botulinum C str. Eklund	NZ_ABDQ00000000	WGS	2578	1,8	None
79	C.botulinum Bf	NZ_ABDP00000000	WGS	3904	1,8	None
80	C.botulinum NCTC 2916	NZ_ABDO00000000	WGS	3668	1,8	None
81	C.botulinum A3 str. Loch Maree	NC_010520	Complete	3655	1,8		PLoS ONE. 2007 Dec 5;2(12):e1271. Analysis of the neurotoxin complex genes in Clostridium botulinum A1-A4 and B1 strains: BoNT/A3, /Ba4 and /B1 clusters are located within plasmids.Smith TJ, Hill KK, Foley BT, Detter JC, Munk AC, Bruce DC, Doggett NA, Smith LA, Marks JD, Xie G, Brettin TS.
82	C.botulinum B1 str. Okra	NC_010516	Complete	3657	1,8		PLoS ONE. 2007 Dec 5;2(12):e1271. Analysis of the neurotoxin complex genes in Clostridium botulinum A1-A4 and B1 strains: BoNT/A3, /Ba4 and /B1 clusters are located within plasmids.Smith TJ, Hill KK, Foley BT, Detter JC, Munk AC, Bruce DC, Doggett NA, Smith LA, Marks JD, Xie G, Brettin TS.
83	C.botulinum A str. ATCC 19397	NC_009697	Complete	3548	1,8	None
84	C.botulinum A str. Hall	NC_009698	Complete	3404	1,8	None
85	C.botulinum F str. Langeland	NC_009699	Complete	3635	1,8	None
86	C.botulinum E3 str. Alaska E43	NC_010723	Complete	3256	1,8	None
87	B.fragilis NCTC 9343	NC_003228	Complete	4184	1,6		Science. 2005 Mar 4;307(5714):1463-5. Extensive DNA inversions in the B. fragilis genome control variable gene expression.Cerdeño-Tárraga AM, Patrick S, Crossman LC, Blakely G, Abratt V, Lennard N, Poxton I, Duerden B, Harris B, Quail MA, Barron A, Clark L, Corton C, Doggett J, Holden MT, Larke N, Line A, Lord A, Norbertczak H, Ormond D, Price C, Rabbinowitsch E, Woodward J, Barrell B, Parkhill J.
88	B.dorei DSM 17855	NZ_ABWZ00000000	WGS	4966	1	None
89	B.coprocola DSM 17136	NZ_ABIY00000000	WGS	4291	1,6	None
90	B.stercoris ATCC 43183	NZ_ABFZ00000000	WGS	3777	1,6	None
91	B.caccae ATCC 43185	NZ_AAVM00000000	WGS	3855	1,6	None
92	B.ovatus ATCC 8483	NZ_AAXF00000000	WGS	5536	1,6	None
93	B.capillosus ATCC 29799	NZ_AAXG00000000	WGS	4833	1	None
94	B.uniformis ATCC 8492	NZ_AAYH00000000	WGS	4663	1,6	None
95	B.intestinalis DSM 17393	NZ_ABJL00000000	WGS	4911	1,6	None
96	B.plebeius DSM 17135	NZ_ABQC00000000	WGS	3933	1,6	None
97	B.finegoldii DSM 17565	NZ_ABXI00000000	WGS	4445	1,6	None
98	C.jejuni subsp. jejuni NCTC 11168	NC_002163	Complete	1623	1		Nature. 2000 Feb 10;403(6770):665-8. The genome sequence of the food-borne pathogen Campylobacter jejuni reveals hypervariable sequences.Parkhill J, Wren BW, Mungall K, Ketley JM, Churcher C, Basham D, Chillingworth T, Davies RM, Feltwell T, Holroyd S, Jagels K, Karlyshev AV, Moule S, Pallen MJ, Penn CW, Quail MA, Rajandream MA, Rutherford KM, van Vliet AH, Whitehead S, Barrell BG.
99	C.jejuni RM1221	NC_003912	Complete	1838	1		PLoS Biol. 2005 Jan;3(1):e15. Epub 2005 Jan 4. Major structural differences and novel potential virulence mechanisms from the genomes of multiple campylobacter species.Fouts DE, Mongodin EF, Mandrell RE, Miller WG, Rasko DA, Ravel J, Brinkac LM, DeBoy RT, Parker CT, Daugherty SC, Dodson RJ, Durkin AS, Madupu R, Sullivan SA, Shetty JU, Ayodeji MA, Shvartsbeyn A, Schatz MC, Badger JH, Fraser CM, Ne…
100	C.jejuni subsp. jejuni 81-176	NC_008787	Complete	1653	1	None
101	C.hominis ATCC BAA-381	NC_009714	Complete	1682	1	None
102	C.curvus 525.92	NC_009715	Complete	1931	1	None
103	C.concisus 13826	NC_009802	Complete	1929	1	None
104	C.jejuni subsp. jejuni 81116	NC_009839	Complete	1626	1		J Bacteriol. 2007 Nov;189(22):8402-3. Epub 2007 Sep 14. The complete genome sequence of Campylobacter jejuni strain 81116 (NCTC11828).Pearson BM, Gaskin DJ, Segers RP, Wells JM, Nuijten PJ, van Vliet AH.
105	C.upsaliensis RM3195	NZ_AAFJ00000000	WGS	1934	1	None
106	C.jejuni subsp. jejuni CF93-6	NZ_AANJ00000000	WGS	1803	1	None
107	C.jejuni subsp. jejuni HB93-13	NZ_AANQ00000000	WGS	1710	1	None
108	P.stuartii ATCC 25827	NZ_ABJD00000000	WGS	4737	1	None
109	P.rustigianii DSM 4541	NZ_ABXV00000000	WGS	3856	1	None
110	P.alcalifaciens DSM 30120	NZ_ABXW00000000	WGS	4022	1	None
111	P.mirabilis HI4320	NC_010554	Complete	3607	1		J Bacteriol. 2008 Jun;190(11):4027-37. Epub 2008 Mar 28. Complete genome sequence of uropathogenic Proteus mirabilis, a master of both adherence and motility.Pearson MM, Sebaihia M, Churcher C, Quail MA, Seshasayee AS, Luscombe NM, Abdellah Z, Arrosmith C, Atkin B, Chillingworth T, Hauser H, Jagels K, Moule S, Mungall K, Norbertczak H, Rabbinowitsch E, Walker D, Whithead S, Thomson NR, Rather PN,…
112	L.monocytogenes str. 4b F2365	NC_002973	Complete	2821	1		Nucleic Acids Res. 2004 Apr 28;32(8):2386-95. Print 2004. Whole genome comparisons of serotype 4b and 1/2a strains of the food-borne pathogen Listeria monocytogenes reveal new insights into the core genome components of this species.Nelson KE, Fouts DE, Mongodin EF, Ravel J, DeBoy RT, Kolonay JF, Rasko DA, Angiuoli SV, Gill SR, Paulsen IT, Peterson J, White O, Nelson WC, Nierman W, Beanan MJ, Bri…
113	L. monocytogenes EGD-e	NC_003210	Complete	2846	1		Science. 2001 Oct 26;294(5543):849-52. Comparative genomics of Listeria species.Glaser P, Frangeul L, Buchrieser C, Rusniok C, Amend A, Baquero F, Berche P, Bloecker H, Brandt P, Chakraborty T, Charbit A, Chetouani F, Couvé E, de Daruvar A, Dehoux P, Domann E, Domínguez-Bernal G, Duchaud E, Durant L, Dussurget O, Entian KD, Fsihi H, García-del Portillo F, Garrido P, Gautier L, Goebel W, Gómez-Lóp…
114	L.monocytogenes HCC23	NC_011660	Complete	2974	1	None
115	L.monocytogenes str. 1/2a F6854	NZ_AADQ00000000	WGS	2967	1	None
116	L.monocytogenes str. 4b H7858	NZ_AADR00000000	WGS	3111	1	None
117	R.yphi str. Wilmington	NC_006142	Complete	838	1		J Bacteriol. 2004 Sep;186(17):5842-55. Complete genome sequence of Rickettsia typhi and comparison with sequences of other rickettsiae.McLeod MP, Qin X, Karpathy SE, Gioia J, Highlander SK, Fox GE, McNeill TZ, Jiang H, Muzny D, Jacob LS, Hawes AC, Sodergren E, Gill R, Hume J, Morgan M, Fan G, Amin AG, Gibbs RA, Hong C, Yu XJ, Walker DH, Weinstock GM.
118	S.typhimurium LT2	NC_003197	Complete	4423	1		Nature. 2001 Oct 25;413(6858):852-6. Complete genome sequence of Salmonella enterica serovar Typhimurium LT2.McClelland M, Sanderson KE, Spieth J, Clifton SW, Latreille P, Courtney L, Porwollik S, Ali J, Dante M, Du F, Hou S, Layman D, Leonard S, Nguyen C, Scott K, Holmes A, Grewal N, Mulvaney E, Ryan E, Sun H, Florea L, Miller W, Stoneking T, Nhan M, Waterston R, Wilson RK.
119	S.Typhi str. 404ty	NZ_CAAQ00000000	WGS	8624	1	None
120	S.Typhi str. E00-7866	NZ_CAAR00000000	WGS	5336	1	None
121	S.Typhi str. E01-6750	NZ_CAAS00000000	WGS	7397	1	None
122	S.Typhi str. E02-1180	NZ_CAAT00000000	WGS	4493	1	None
123	S.Typhi str. E98-2068	NZ_CAAV00000000	WGS	3875	1	None
124	S.Typhi str. J185	NZ_CAAW00000000	WGS	2871	1	None
125	S.Typhi str. M223	NZ_CAAX00000000	WGS	6744	1	None
126	S.Typhi str. AG3	NZ_CAAY00000000	WGS	9560	1	None
127	S.Virchow str. SL491	NZ_ABFH00000000	WGS	4654	1	None
128	S.Hadar str. RI_05P066	NZ_ABFG00000000	WGS	4477	1	None
129	S.Weltevreden str. HI_N05-537	NZ_ABFF00000000	WGS	4728	1	None
130	S.Newport str. SL317	NZ_ABEW00000000	WGS	4723	1	None
131	S.Heidelberg str. SL486	NZ_ABEL00000000	WGS	4471	1	None
132	S.Schwarzengrund str. SL480	NZ_ABEJ00000000	WGS	4490	1	None
133	S.Kentucky str. CDC 191	NZ_ABEI00000000	WGS	4388	1	None
134	S.Javiana str. GA_MM04042433	NZ_ABEH00000000	WGS	4234	1	None
135	S.4,[5],12:i:- str. CVM23701	NZ_ABAO00000000	WGS	4602	1	None
136	S.Saintpaul str. SARA29	NZ_ABAN00000000	WGS	4469	1	None
137	S.Saintpaul str. SARA23	NZ_ABAM00000000	WGS	4463	1	None
138	S.Kentucky str. CVM29188	NZ_ABAK00000000	WGS	4552	1	None
139	S.Enteritidis str. P125109	NC_011294	Complete	4206	1		Genome Res. 2008 Oct;18(10):1624-37. Epub 2008 Jun 26. Comparative genome analysis of Salmonella Enteritidis PT4 and Salmonella Gallinarum 287/91 provides insights into evolutionary and host adaptation pathways.Thomson NR, Clayton DJ, Windhorst D, Vernikos G, Davidson S, Churcher C, Quail MA, Stevens M, Jones MA, Watson M, Barron A, Layton A, Pickard D, Kingsley RA, Bignell A, Clark L, Harris B, …
140	S.Gallinarum str. 287/91	NC_011274	Complete	3965	1	None
141	S.Dublin str. CT_02021853	NC_011205	Complete	4514	1	None
142	S.Agona str. SL483	NC_011149	Complete	4562	1	None
143	S.A str. AKU_12601	NC_011147	Complete	4078	1	None
144	S.Schwarzengrund str. CVM19633	NC_011094	Complete	4500	1	None
145	S.Heidelberg str. SL476	NC_011083	Complete	4650	1	None
146	S.Newport str. SL254	NC_011080	Complete	4612	1	None
147	S.Paratyphi B str. SPB7	NC_010102	Complete	5592	1	None
148	S.Choleraesuis str. SC-B67	NC_006905	Complete	4413	1		Nucleic Acids Res. 2005 Mar 21;33(5):1690-8. Print 2005. 2005;33(7):2351. The genome sequence of Salmonella enterica serovar Choleraesuis, a highly invasive and resistant zoonotic pathogen.Chiu CH, Tang P, Chu C, Hu S, Bao Q, Yu J, Chou YY, Wang HS, Lee YS.
149	S.Paratyphi A str. ATCC 9150	NC_006511	Complete	4093	1		Nat Genet. 2004 Dec;36(12):1268-74. Epub 2004 Nov 7. Comparison of genome degradation in Paratyphi A and Typhi, human-restricted serovars of Salmonella enterica that cause typhoid.McClelland M, Sanderson KE, Clifton SW, Latreille P, Porwollik S, Sabo A, Meyer R, Bieri T, Ozersky P, McLellan M, Harkins CR, Wang C, Nguyen C, Berghoff A, Elliott G, Kohlberg S, Strong C, Du F, Carter J, Kremizki C, L…
150	S.Typhi Ty2	NC_004631	Complete	4645	1		J Bacteriol. 2003 Apr;185(7):2330-7. Comparative genomics of Salmonella enterica serovar Typhi strains Ty2 and CT18.Deng W, Liou SR, Plunkett G 3rd, Mayhew GF, Rose DJ, Burland V, Kodoyianni V, Schwartz DC, Blattner FR.
151	S.Typhi str. CT18	NC_003198	Complete	4395	1		Nature. 2001 Oct 25;413(6858):848-52. Complete genome sequence of a multiple drug resistant Salmonella enterica serovar Typhi CT18.Parkhill J, Dougan G, James KD, Thomson NR, Pickard D, Wain J, Churcher C, Mungall KL, Bentley SD, Holden MT, Sebaihia M, Baker S, Basham D, Brooks K, Chillingworth T, Connerton P, Cronin A, Davis P, Davies RM, Dowd L, White N, Farrar J, Feltwell T, Hamlin N, Haque A,…
152	S.arizonae serovar 62:z4,z23:--	NC_010067	Complete	4498	1	None
153	C.intestinalis DSM 13280	NZ_ABXH00000000	WGS	1786	1	None
154	C.stercoris DSM 13279	NZ_ABXJ00000000	WGS	2529	1	None
155	C.aerofaciens ATCC 25986	NZ_AAVN00000000	WGS	2367	1	None
156	V.vadensis ATCC BAA-548	NZ_ABDE00000000	WGS	3541	1	None
157	R.obeum ATCC 29174	NZ_AAVO00000000	WGS	4175	1	None
158	R.torques ATCC 27756	NZ_AAVP00000000	WGS	2875	1	None
159	R.gnavus ATCC 29149	NZ_AAYG00000000	WGS	3913	1	None
160	R.lactaris ATCC 29176	NZ_ABOU00000000	WGS	2750	1	None
161	B.cereus ATCC 10987	NC_003909	Complete	5603	1		Nucleic Acids Res. 2004 Feb 11;32(3):977-88. Print 2004. The genome sequence of Bacillus cereus ATCC 10987 reveals metabolic adaptations and a large plasmid related to Bacillus anthracis pXO1.Rasko DA, Ravel J, Økstad OA, Helgason E, Cer RZ, Jiang L, Shores KA, Fouts DE, Tourasse NJ, Angiuoli SV, Kolonay J, Nelson WC, Kolstø AB, Fraser CM, Read TD.
162	B.cereus H3081.97	NZ_ABDL00000000	WGS	4970	1	None
163	B.cereus G9842	NZ_ABDJ00000000	WGS		1	None
164	B.cereus G9241	NZ_AAEK00000000	WGS	2367	1	None
165	B.cereus W	NZ_ABCZ00000000	WGS	5160	1	None
166	B.cereus AH187	NC_011658	Complete	5399	1	None
167	B.cereus subsp cytotoxis NVH 391-98	NC_009674	Complete	3833	1		Chem Biol Interact. 2008 Jan 30;171(2):236-49. Epub 2007 Mar 12. Extending the Bacillus cereus group genomics to putative food-borne pathogens of different toxicity.Lapidus A, Goltsman E, Auger S, Galleron N, Ségurens B, Dossat C, Land ML, Broussolle V, Brillard J, Guinebretiere MH, Sanchis V, Nguen-The C, Lereclus D, Richardson P, Wincker P, Weissenbach J, Ehrlich SD, Sorokin A.
168	B.thuringiensis serovar konkukian str. 97-27	NC_005957	Complete	5117	1		J Bacteriol. 2006 May;188(9):3382-90. 2006 Nov;188(21):7711. Brown, Nancy [added]; Green, Lance D [added]. Pathogenomic sequence analysis of Bacillus cereus and Bacillus thuringiensis isolates closely related to Bacillus anthracis.Han CS, Xie G, Challacombe JF, Altherr MR, Bhotika SS, Brown N, Bruce D, Campbell CS, Campbell ML, Chen J, Chertkov O, Cleland C, Dimitrijevic M, Doggett NA, Fawcett JJ…
169	B.longum NCC2705	NC_004307	Complete	1727	1		Proc Natl Acad Sci U S A. 2002 Oct 29;99(22):14422-7. Epub 2002 Oct 15. 2005 Jun 28;102(26):9430. The genome sequence of Bifidobacterium longum reflects its adaptation to the human gastrointestinal tract.Schell MA, Karmirantzou M, Snel B, Vilanova D, Berger B, Pessi G, Zwahlen MC, Desiere F, Bork P, Delley M, Pridmore RD, Arigoni F.
170	B.dentium ATCC 27678	NZ_ABIX00000000	WGS	2430	1	None
171	B.adolescentis L2-32	NZ_AAXD00000000	WGS	2428	1	None
172	B.adolescentis ATCC 15703	NC_008618	Complete	1631	1	None
173	B.longum DJO10A	NC_010816	Complete	1990	1		Appl Environ Microbiol. 2006 Jan;72(1):527-35. Sequence analysis of two cryptic plasmids from Bifidobacterium longum DJO10A and construction of a shuttle cloning vector.Lee JH, O'Sullivan DJ.
174	B.pseudocatenulatum DSM 20438	NZ_ABXX00000000	WGS	2151	1	None
175	B.longum subsp. infantis ATCC 15697	NC_011593	Complete	2416	1		Proc Natl Acad Sci U S A. 2008 Dec 2;105(48):18964-9. The genome sequence of Bifidobacterium longum subsp. infantis reveals adaptations for milk utilization within the infant microbiome.Sela DA, Chapman J, Adeuya A, Kim JH, Chen F, Whitehead TR, Lapidus A, Rokhsar DS, Lebrilla CB, German JB, Price NP, Richardson PM, Mills DA.
176	S.flexneri 2a str. 301	NC_004337	Complete	4177	1		Nucleic Acids Res. 2002 Oct 15;30(20):4432-41. Genome sequence of Shigella flexneri 2a: insights into pathogenicity through comparison with genomes of Escherichia coli K12 and O157.Jin Q, Yuan Z, Xu J, Wang Y, Shen Y, Lu W, Wang J, Liu H, Yang J, Yang F, Zhang X, Zhang J, Yang G, Wu H, Qu D, Dong J, Sun L, Xue Y, Zhao A, Gao Y, Zhu J, Kan B, Ding K, Chen S, Cheng H, Yao Z, He B, Chen R, Ma D, Qia…
177	S.flexneri 2a str. 2457T	NC_004741	Complete	4061	1		Infect Immun. 2003 May;71(5):2775-86. 2003 Jul;71(7):4223. Complete genome sequence and comparative genomics of Shigella flexneri serotype 2a strain 2457T.Wei J, Goldberg MB, Burland V, Venkatesan MM, Deng W, Fournier G, Mayhew GF, Plunkett G 3rd, Rose DJ, Darling A, Mau B, Perna NT, Payne SM, Runyen-Janecky LJ, Zhou S, Schwartz DC, Blattner FR.
178	S.sonnei Ss046	NC_007384	Complete	4219	1		Nucleic Acids Res. 2005 Nov 7;33(19):6445-58. Genome dynamics and diversity of Shigella species, the etiologic agents of bacillary dysentery.Yang F, Yang J, Zhang X, Chen L, Jiang Y, Yan Y, Tang X, Wang J, Xiong Z, Dong J, Xue Y, Zhu Y, Xu X, Sun L, Chen S, Nie H, Peng J, Xu J, Wang Y, Yuan Z, Wen Y, Yao Z, Shen Y, Qiang B, Hou Y, Yu J, Jin Q.
179	S.dysenteriae Sd197	NC_007606	Complete	4271	1		Nucleic Acids Res. 2005 Nov 7;33(19):6445-58. Print 2005. Genome dynamics and diversity of Shigella species, the etiologic agents of bacillary dysentery.Yang F, Yang J, Zhang X, Chen L, Jiang Y, Yan Y, Tang X, Wang J, Xiong Z, Dong J, Xue Y, Zhu Y, Xu X, Sun L, Chen S, Nie H, Peng J, Xu J, Wang Y, Yuan Z, Wen Y, Yao Z, Shen Y, Qiang B, Hou Y, Yu J, Jin Q.
180	S.boydii Sb227	NC_007613	Complete	4134	1		Nucleic Acids Res. 2005 Nov 7;33(19):6445-58. Genome dynamics and diversity of Shigella species, the etiologic agents of bacillary dysentery.Yang F, Yang J, Zhang X, Chen L, Jiang Y, Yan Y, Tang X, Wang J, Xiong Z, Dong J, Xue Y, Zhu Y, Xu X, Sun L, Chen S, Nie H, Peng J, Xu J, Wang Y, Yuan Z, Wen Y, Yao Z, Shen Y, Qiang B, Hou Y, Yu J, Jin Q.
181	S.flexneri 5 str. 8401	NC_008258	Complete	4115	1		BMC Genomics. 2006 Jul 6;7:173. Complete genome sequence of Shigella flexneri 5b and comparison with Shigella flexneri 2a.Nie H, Yang F, Zhang X, Yang J, Chen L, Wang J, Xiong Z, Peng J, Sun L, Dong J, Xue Y, Xu X, Chen S, Yao Z, Shen Y, Jin Q.
182	S.boydii CDC 3083-94	NC_010658	Complete	4246	1	None
183	S.dysenteriae 1012	NZ_AAMJ00000000	WGS	4419	1	None
184	D.formicigenerans ATCC 27755	NZ_AAXA00000000	WGS	3277	1	None
185	D.longicatena DSM 13814	NZ_AAXB00000000	WGS	2970	1	None
186	S.suis 05ZYH33	NC_009442	Complete	2186	1		PLoS ONE. 2007 Mar 21;2(3):e315. A glimpse of streptococcal toxic shock syndrome from comparative genomics of S. suis 2 Chinese isolates.Chen C, Tang J, Dong W, Wang C, Feng Y, Wang J, Zheng F, Pan X, Liu D, Li M, Song Y, Zhu X, Sun H, Feng T, Guo Z, Ju A, Ge J, Dong Y, Sun W, Jiang Y, Wang J, Yan J, Yang H, Wang X, Gao GF, Yang R, Wang J, Yu J.
187	S.subsp. infantarius ATCC BAA-102	NZ_ABJK00000000	WGS	2051	1	None
188	V.vulnificus CMCP6	NC_004459	Complete	2915	1		Infect Immun. 2003 Oct;71(10):5461-71. Characterization and pathogenic significance of Vibrio vulnificus antigens preferentially expressed in septicemic patients.Kim YR, Lee SE, Kim CM, Kim SY, Shin EK, Shin DH, Chung SS, Choy HE, Progulske-Fox A, Hillman JD, Handfield M, Rhee JH.
189	V.vulnificus YJ016 chromosome I	NC_005139	Complete	3259	1		Genome Res. 2003 Dec;13(12):2577-87. Comparative genome analysis of Vibrio vulnificus, a marine pathogen.Chen CY, Wu KM, Chang YC, Chang CH, Tsai HC, Liao TL, Liu YM, Chen HJ, Shen AB, Li JC, Su TL, Shao CP, Lee CT, Hor LI, Tsai SF.
190	V.cholerae V52	NZ_AAKJ00000000	WGS	3815	1	None
191	V.cholerae 1587	NZ_AAUR00000000	WGS	3758	1	None
192	V.cholerae MAK 757	NZ_AAUS00000000	WGS	3501	1	None
193	V.cholerae MZO-3	NZ_AAUU00000000	WGS	3897	1	None
194	V.cholerae NCTC 8457	NZ_AAWD00000000	WGS	3975	1	None
195	V.cholerae B33	NZ_AAWE00000000	WGS	3677	1	None
196	V.cholerae MZO-2	NZ_AAWF00000000	WGS	3425	1	None
197	V.cholerae 623-39	NZ_AAWG00000000	WGS	3777	1	None
198	T.whipplei TW08/27	NC_004551	Complete	783	1		Lancet. 2003 Feb 22;361(9358):637-44. Sequencing and analysis of the genome of the Whipple's disease bacterium Tropheryma whipplei.Bentley SD, Maiwald M, Murphy LD, Pallen MJ, Yeats CA, Dover LG, Norbertczak HT, Besra GS, Quail MA, Harris DE, von Herbay A, Goble A, Rutter S, Squares R, Squares S, Barrell BG, Parkhill J, Relman DA.
199	T.whipplei str. Twist	NC_004572	Complete	808	1		Genome Res. 2003 Aug;13(8):1800-9. Tropheryma whipplei Twist: a human pathogenic Actinobacteria with a reduced genome.Raoult D, Ogata H, Audic S, Robert C, Suhre K, Drancourt M, Claverie JM.
200	M.multacida DSM 20544	NZ_ABWK00000000	WGS	2665	1	None
201	L.salivarius UCC118	NC_007929	Complete	1717	1		Proc Natl Acad Sci U S A. 2006 Apr 25;103(17):6718-23. Epub 2006 Apr 14. Multireplicon genome architecture of Lactobacillus salivarius.Claesson MJ, Li Y, Leahy S, Canchaya C, van Pijkeren JP, Cerdeño-Tárraga AM, Parkhill J, Flynn S, O'Sullivan GC, Collins JK, Higgins D, Shanahan F, Fitzgerald GF, van Sinderen D, O'Toole PW.
202	L.reuteri F275	NC_009513	Complete	1900	1	None
203	L.reuteri JCM 1112	NC_010609	Complete	1820	1		DNA Res. 2008 Jun 30;15(3):151-61. Epub 2008 May 16. Comparative genome analysis of Lactobacillus reuteri and Lactobacillus fermentum reveal a genomic island for reuterin and cobalamin production.Morita H, Toh H, Fukuda S, Horikawa H, Oshima K, Suzuki T, Murakami M, Hisamatsu S, Kato Y, Takizawa T, Fukuoka H, Yoshimura T, Itoh K, O'Sullivan DJ, McKay LL, Ohno H, Kikuchi J, Masaoka T, Hattori M.
204	M.stadtmanae DSM 3091	NC_007681	Complete	1534	1		J Bacteriol. 2006 Jan;188(2):642-58. The genome sequence of Methanosphaera stadtmanae reveals why this human intestinal archaeon is restricted to methanol and H2 for methane formation and ATP synthesis.Fricke WF, Seedorf H, Henne A, Krüer M, Liesegang H, Hedderich R, Gottschalk G, Thauer RK.
205	E.ventriosum ATCC 27560	NZ_AAVL00000000	WGS	2802	1	None
206	E.dolichum DSM 3991	NZ_ABAW00000000	WGS	2350	1	None
207	E.siraeum DSM 15702	NZ_ABCA00000000	WGS	2703	1	None
208	P.merdae ATCC 43184	NZ_AAXE00000000	WGS	4384	1	None
209	P.johnsonii DSM 18315	NZ_ABYH00000000	WGS	4515	1	None
210	Y. subsp. enterocolitica 8081	NC_008800	Complete	3979	1		PLoS Genet. 2006 Dec 15;2(12):e206. The complete genome sequence and comparative genome analysis of the high pathogenicity Yersinia enterocolitica strain 8081.Thomson NR, Howard S, Wren BW, Holden MT, Crossman L, Challis GL, Churcher C, Mungall K, Brooks K, Chillingworth T, Feltwell T, Abdellah Z, Hauser H, Jagels K, Maddison M, Moule S, Sanders M, Whitehead S, Quail MA, Dougan G, Parkhill J, Pre…
211	Y.bercovieri ATCC 43970	NZ_AALC00000000	WGS	3579	1	None
212	M.smithii ATCC 35061	NC_009515	Complete	1793	1		Proc Natl Acad Sci U S A. 2007 Jun 19;104(25):10643-8. Epub 2007 Jun 11. Genomic and metabolic adaptations of Methanobrevibacter smithii to the human gut.Samuel BS, Hansen EE, Manchester JK, Coutinho PM, Henrissat B, Fulton R, Latreille P, Kim K, Wilson RK, Gordon JI.
213	K. subsp. pneumoniae MGH 78578	NC_009648	Complete	4776	1	None
214	A.muciniphila ATCC BAA-835	NC_010655	Complete	2138	1	None
215	A.odontolyticus ATCC 17982	NZ_AAYI00000000	WGS	2159	1	None
216	F.prausnitzii M21/2	NZ_ABED00000000	WGS	3493	1	None
217	E.cancerogenus ATCC 35316	NZ_ABWM00000000	WGS	4572	1	None
218	A.caccae DSM 14662	NZ_ABAX00000000	WGS	3748	1	None
219	P.micros ATCC 33270	NZ_ABEE00000000	WGS	1678	1	None
220	C.eutactus ATCC 27759	NZ_ABEY00000000	WGS	2982	1	None
221	A.putredinis DSM 17216	NZ_ABFK00000000	WGS	2742	1	None
222	A.colihominis DSM 17241	NZ_ABGD00000000	WGS	4427	1	None
223	A.stercorihominis DSM 17244	NZ_ABIL00000000	WGS	2331	1	None
224	R.intestinalis L1-82	NZ_ABYJ00000000	WGS	4817	1	None
